# Supplementary material for: Combination of Bacillus and Low Fertigation Input Promoted the Growth and Productivity of Chinese Cabbage and Enriched Beneficial Rhizosphere Bacteria Lechevalieria
Source: MDPI journal article supplement (doi:10.3390/biology12081130), 2023-08-14
Supplement: s1 [file s1]

Supplementary materials to the Article

Combination of *Bacillus* and Low Fertigation Input Promoted the Growth and Productivity of Chinese Cabbage and Enriched Beneficial Rhizosphere Bacteria *Lechevalieria*

Shi-Chang Zhang <sup>1,2</sup>, Yu-Lu Zhang <sup>1</sup>, Xiao-Jing Guo <sup>1</sup>, Ming Luo <sup>2</sup>, Shi-Dong Li <sup>1</sup> and Rong-Jun Guo <sup>2,\*</sup>

<sup>1</sup> State Key Laboratory for Biology of Plant Diseases and Insect Pests, Institute of Plant Protection, Chinese Academy of Agricultural Sciences, Beijing 100193, P. R. China;

<sup>2</sup> College of Agriculture, Xinjiang Agricultural University, Wulumuqi 830052, P. R. China;

\* Correspondence: guorongjun@caas.cn

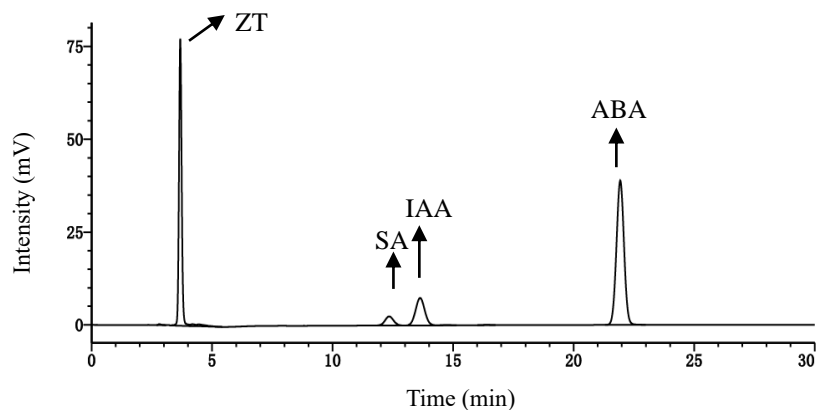

| Hormone | Concentration<br>( $\mu\text{g mL}^{-1}$ ) | Linear equation        | Correlation coefficient | Detection limit<br>( $\text{ng mL}^{-1}$ ) |
|---------|--------------------------------------------|------------------------|-------------------------|--------------------------------------------|
| ABA     | 0.05–1.0                                   | $y = 49115x - 288.82$  | 1.0000                  | 20.0                                       |
| IAA     | 0.2–10.0                                   | $y = 7325.1x - 139.57$ | 1.0000                  | 100.0                                      |
| SA      | 1.0–40.0                                   | $y = 2596.2x - 1230.1$ | 0.9991                  | 400.0                                      |
| ZT      | 1.0–40.0                                   | $y = 28662x - 23967$   | 0.9983                  | 10.0                                       |

**Figure S1** Chromatograms and standard curves of plant hormones detected by HPLC at 254 nm.

ABA, abscisic acid; IAA, indole-3-acetic acid; SA, salicylic acid, and ZT, zeatin. Linear equation,  $x$  and  $y$  represent the concentration and relative peak area of each plant hormone respectively.

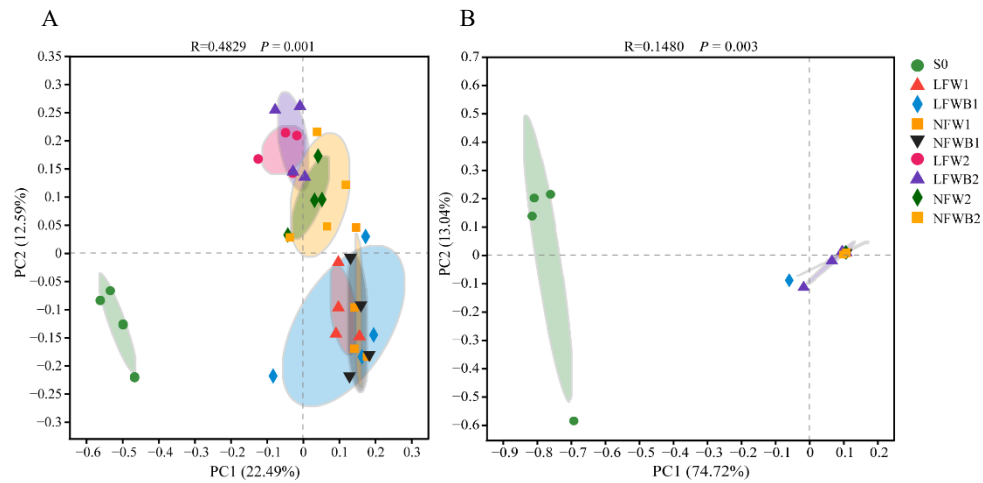

**Figure S2** PCoA analysis of the communities of bacteria (A) and fungi (B) in the bulk soil and cabbage rhizosphere soil.

S0, bulk soil samples collected at time 0; LFW, low input fertigation; NFW, normal input fertigation; B, with B006 application; 1 and 2, rhizosphere soil collected at stages T1 and T2, **respectively**.

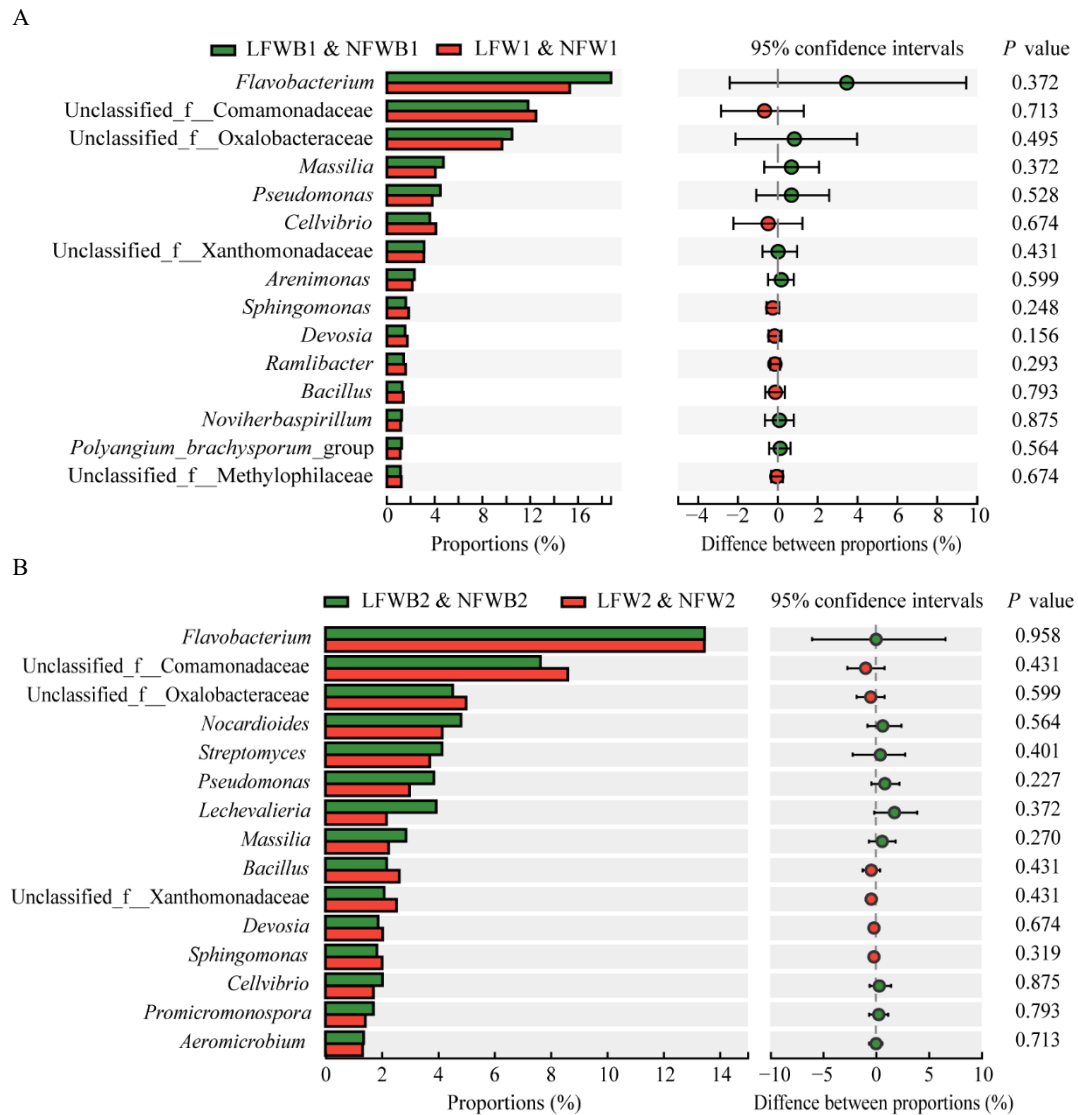

**Figure S3** Differential bacterial genera generated from the pair-group comparison of groups LFWB1 & NFWB1 vs. LFW1 & NFW1 (A) and LFWB2 & NFWB2 vs. LFW2 & NFW2 (B).

LFW, low input fertigation; NFW, normal input fertigation; B, application with B006; 1 and 2, rhizosphere soil collected at stages T1 and T2, **respectively**.

**Table S1** Experimental design of different fertigation treatments combined with *Bacillus* application.<sup>a</sup>

| Treatment <sup>b</sup> | S0              | T1                         |                                                         |                                                           | T2                         |                                                         |                                                           | T3                         |                                                         |                                                           |
|------------------------|-----------------|----------------------------|---------------------------------------------------------|-----------------------------------------------------------|----------------------------|---------------------------------------------------------|-----------------------------------------------------------|----------------------------|---------------------------------------------------------|-----------------------------------------------------------|
|                        |                 | Soil water potential (kPa) | Practical irrigation (m <sup>3</sup> hm <sup>-2</sup> ) | Amount of water soluble fertilizer (Kg hm <sup>-2</sup> ) | Soil water potential (kPa) | Practical irrigation (m <sup>3</sup> hm <sup>-2</sup> ) | Amount of water soluble fertilizer (Kg hm <sup>-2</sup> ) | Soil water potential (kPa) | Practical irrigation (m <sup>3</sup> hm <sup>-2</sup> ) | Amount of water soluble fertilizer (Kg hm <sup>-2</sup> ) |
| LFW                    | Before planting | -30                        | 199.1                                                   | - <sup>c</sup>                                            | -50                        | 26.7                                                    | 62.50                                                     | -45                        | 257.8                                                   | -                                                         |
| LFWB                   |                 |                            |                                                         |                                                           |                            |                                                         |                                                           |                            |                                                         |                                                           |
| NFW                    |                 | -30                        | 199.1                                                   | -                                                         | -30                        | 53.3                                                    | 165.25                                                    | -25                        | 373.3                                                   | -                                                         |
| NFWB                   |                 |                            |                                                         |                                                           |                            |                                                         |                                                           |                            |                                                         |                                                           |

<sup>a</sup> S0, bulk soil samples collected at time 0; T1, T2, and T3, rhizosphere soil collected at stages T1,T2, and T3, **respectively**.

<sup>b</sup> LFW, low fertigation input; NFW, normal fertigation input; B, application with B006.

<sup>c</sup> -, non application.

**Table S2** Amounts of reads and ASVs of the microbial communities in each soil sample.

| Group name <sup>a</sup> | Sample name | Bacteria       |                | Fungi        |             |
|-------------------------|-------------|----------------|----------------|--------------|-------------|
|                         |             | Reads          | ASVs           | Reads        | ASVs        |
| S0                      | S01         | 54070          | 850            | 67073        | 296         |
|                         | S02         | 61119          | 579            | 70907        | 369         |
|                         | S03         | 67832          | 1012           | 67963        | 123         |
|                         | S04         | 65163          | 798            | 61486        | 246         |
| LFW1                    | LFW11       | 50847          | 483            | 75253        | 29          |
|                         | LFW12       | 73934          | 590            | 80822        | 11          |
|                         | LFW13       | 59860          | 551            | 123508       | 14          |
|                         | LFW14       | 54764          | 488            | 127314       | 12          |
| LFWB1                   | LFWB11      | 51749          | 477            | 104343       | 97          |
|                         | LFWB12      | 58491          | 463            | 117311       | 8           |
|                         | LFWB13      | 40613          | 339            | 106083       | 22          |
|                         | LFWB14      | 51265          | 387            | 88739        | 8           |
| NFW1                    | NFW11       | 50644          | 425            | 106180       | 19          |
|                         | NFW12       | 46292          | 328            | 109460       | 28          |
|                         | NFW13       | 63263          | 545            | 118606       | 13          |
|                         | NFW14       | 47175          | 401            | 102315       | 24          |
| NFWB1                   | NFWB11      | 50454          | 453            | 101350       | 10          |
|                         | NFWB12      | 43308          | 345            | 102499       | 7           |
|                         | NFWB13      | 73368          | 538            | 108119       | 17          |
|                         | NFWB14      | 58887          | 439            | 103881       | 18          |
| LFW2                    | LFW21       | 62799          | 511            | 119588       | 8           |
|                         | LFW22       | 61566          | 520            | 102902       | 23          |
|                         | LFW23       | 73168          | 806            | 91147        | 26          |
|                         | LFW24       | 67553          | 629            | 90658        | 19          |
| LFWB2                   | LFWB21      | 66485          | 797            | 119972       | 218         |
|                         | LFWB22      | 63583          | 532            | 126924       | 132         |
|                         | LFWB23      | 69762          | 771            | 98820        | 41          |
|                         | LFWB24      | 73745          | 716            | 101622       | 9           |
| NFW2                    | NFW21       | 68692          | 642            | 104026       | 7           |
|                         | NFW22       | 70827          | 718            | 90111        | 3           |
|                         | NFW23       | 73539          | 722            | 140323       | 10          |
|                         | NFW24       | 71075          | 661            | 159750       | 14          |
| NFWB2                   | NFWB21      | 70630          | 523            | 122690       | 5           |
|                         | NFWB22      | 71494          | 697            | 111405       | 59          |
|                         | NFWB23      | 70307          | 565            | 120908       | 8           |
|                         | NFWB24      | 72015          | 664            | 111322       | 3           |
| <b>Total</b>            |             | <b>2230338</b> | <b>3755380</b> | <b>20965</b> | <b>1956</b> |

<sup>a</sup> S0, bulk soil samples collected at time 0; LFW, low input fertigation; NFW, normal input fertigation;

B, application with B006; 1 and 2, rhizosphere soil collected at stages T1 and T2, **respectively**.

**Table S3** PERMANOVA analysis on the rhizosphere bacterial communities of cabbage collected at stage T2

| Name <sup>a</sup> | Df | Sums of Sqs | Mean Sqs | F. Models | R <sup>2</sup> | Pr (>F) |
|-------------------|----|-------------|----------|-----------|----------------|---------|
| NB vs. B          | 1  | 0.100789    | 0.100789 | 0.79477   | 0.049184       | 0.781   |
| LFW vs. NFW       | 1  | 0.299825    | 0.299825 | 2.364264  | 0.146312       | 0.001   |
| Residuals         | 13 | 1.648602    | 0.126816 | -         | 0.804504       | -       |
| Total             | 15 | 2.049217    | -        | -         | 1              | -       |

<sup>a</sup> LFW, low fertigation input; NFW, normal fertigation input; NB, no B006 application; B, application with B006.

**Table S4** *Lechevalieria* ASVs identified in the cabbage rhizosphere of different treatment combinations <sup>a</sup>.

| ASV     | No. of sequences | Proportion (%) | T1   |       |      |       | T2   |       |      |       |
|---------|------------------|----------------|------|-------|------|-------|------|-------|------|-------|
|         |                  |                | LFW1 | LFWB1 | NFW1 | NFWB1 | LFW2 | LFWB2 | NFW2 | NFWB2 |
| ASV1    | 5621             | 58.45          | 181  | 155   | 331  | 263   | 917  | 2298  | 584  | 892   |
| ASV14   | 3296             | 34.28          | 166  | 141   | 141  | 112   | 910  | 1269  | 266  | 291   |
| ASV13   | 355              | 3.69           | 0    | 0     | 29   | 0     | 0    | 204   | 122  | 0     |
| ASV268  | 101              | 1.05           | 0    | 0     | 0    | 0     | 41   | 60    | 0    | 0     |
| ASV108  | 75               | 0.78           | 0    | 0     | 0    | 0     | 0    | 75    | 0    | 0     |
| ASV2331 | 48               | 0.50           | 0    | 13    | 0    | 0     | 24   | 11    | 0    | 0     |
| ASV3710 | 26               | 0.27           | 0    | 0     | 0    | 0     | 0    | 26    | 0    | 0     |
| ASV315  | 19               | 0.20           | 0    | 0     | 0    | 0     | 0    | 19    | 0    | 0     |
| ASV3701 | 18               | 0.19           | 0    | 0     | 0    | 0     | 0    | 18    | 0    | 0     |
| ASV4118 | 16               | 0.17           | 0    | 0     | 0    | 0     | 0    | 16    | 0    | 0     |
| ASV364  | 14               | 0.15           | 0    | 0     | 0    | 0     | 0    | 14    | 0    | 0     |
| ASV284  | 13               | 0.14           | 0    | 0     | 0    | 0     | 0    | 13    | 0    | 0     |
| ASV4722 | 8                | 0.08           | 0    | 0     | 0    | 0     | 8    | 0     | 0    | 0     |
| ASV4173 | 3                | 0.03           | 0    | 0     | 0    | 0     | 0    | 3     | 0    | 0     |
| ASV2049 | 3                | 0.03           | 0    | 0     | 0    | 0     | 0    | 0     | 0    | 3     |

<sup>a</sup> LFW, low fertigation input; NFW, normal fertigation input; B, application with B006; 1 and 2, rhizosphere soil collected at stages T1 and T2, **respectively**.
